# Supplementary material for: Anticancer Activity and Mechanisms of Action of New Chimeric EGFR/HDAC-Inhibitors
Source: MDPI journal article supplement (doi:10.3390/ijms22168432), 2021-08-05
Supplement: s1 [file s1]

### Supplementary Figure S1:

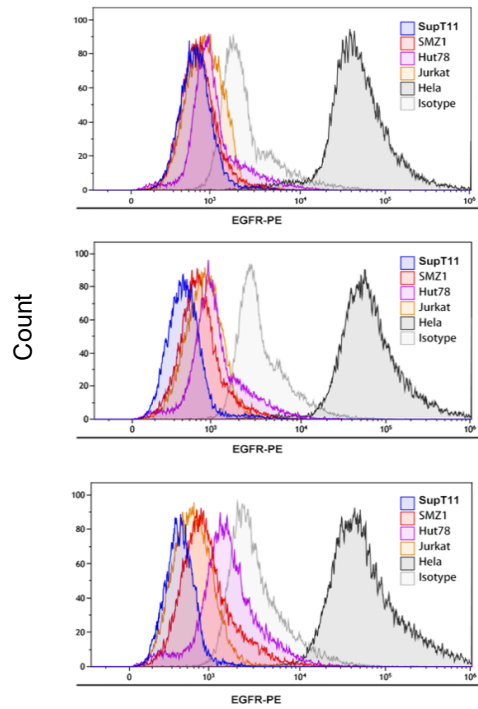

**SF1:** EGFR expression in T-cell lymphoma cell lines. Flow cytometry with PE-EGFR antibodies (anti-human EGFR antibody, Biolegend, # 352903, San Diego, USA) could not reveal a surface expression of the EGFR in the lymphoma cell lines SupT11, SMZ1, Hut78 and Jurkat, while HeLa cells, serving as EGFR-positive control cells, showed a strong signal. PE mouse IgG1, $\kappa$  (Biolegend, # 4001139) was used as an isotypic control antibody. The figure shows data from three individual repetitions of the experiment.
